# Supplementary material for: Structural design of biomass-derived hard carbon anode materials for superior sodium storage via increasing crystalline cellulose and closing the open pores
Source: Royal Society of Chemistry journal article supplement (doi:10.1039/d4ta03284e), 2024-01-01
Supplement: d4ta03284e1.pdf [file d4ta03284e1.pdf]

## Supporting Information

### **Structural design of biomass-derived hard carbon anode materials for superior sodium storage via increasing crystalline cellulose and closing the open pores**

Xiaoying Li<sup>1</sup>, Sijing Zhang<sup>1</sup>, Jingjing Tang<sup>1\*</sup>, Juan Yang<sup>1</sup>, Kang Wen<sup>2</sup>, Jiong Wang<sup>2</sup>,  
Peng Wang<sup>3</sup>, Xiangyang Zhou<sup>1</sup>, Yaguang Zhang<sup>1</sup>

1 School of Metallurgy and Environment, Central South University, Changsha  
410083, Hunan, China

2 Chenyu-Fuji New Energy Technology Company Limited, Changsha 410083, Hunan,  
China

3 Dali Chenyu Energy Storage New Material Company Limited, DaLi 671000, Yunan,  
China

\*Corresponding author

Email address: tangjj@csu.edu.cn.

## **Experimental**

### *Material synthesis*

Almond (Badam) shells from Xinjiang in northwest China were crushed into fine powder by a small high-speed grinder. The almond shell powder was firstly stirred in 2.25 M HF solution at room temperature for 6 h to remove inorganic impurities. After that, it was washed with deionized water to neutral and dried in the oven at 80 °C overnight. To enhance the cellulose crystallinity and regulate the amorphous component content within the precursors, the purified powder was stirred in 6 M and 10 M HCl solution, respectively, at room temperature for 6 h. Then, the powder was washed with deionized water and dried in the oven at 80 °C overnight. The obtained precursors, along with that solely treated with HF solution, were subjected to carbonization at 600 °C for 2 h in a tubular furnace under argon flow, with a heating rate of 5 °C min<sup>-1</sup>. After cooling to room temperature, the pre-carbonized samples were further carbonized at 1300 °C for 3 hours under argon flow with the same heating rate. The resultant hard carbon materials were denoted as A-2.25, A-2.25-6, and A-2.25-10, respectively. A sample treated with 2.25 M HF and 6 M HCl underwent a two-step pre-carbonization to investigate the influence of heating rate and residence temperature. This sample experienced a gradual temperature increase to 400 °C at a rate of 1 °C min<sup>-1</sup> for 1 h, followed by a ramp to 600 °C at 5 °C min<sup>-1</sup> for 1 hour before cooling to room temperature. Subsequently, the sample underwent carbonization under identical high-temperature conditions as the other samples and was designated as A-2.25-6-T.

### *Material characterization*

Fourier transform infrared spectroscopy (FTIR) was performed using an infrared spectrometer (Thermo Scientific Nicolet iS50). The microcrystalline structure of all samples was

characterized by X-ray diffraction (XRD, PANalytical Empyrean 2 with Cu K $\alpha$  radiation ( $\lambda = 0.154$  nm)) and Raman spectra using a Confocal micro raman spectrometer (Renishaw inVia Reflex). The nitrogen adsorption-desorption isothermal curves were tested on a Micromeritics ASAP 2460 analyzer to obtain the Branauer-Emmett-Teller (BET) specific surface area and pore size distribution. The morphology and structure of resulting samples were analyzed by field emission scanning electron microscopy (SEM, ZEISS Sigma 300) and a high-resolution transmission electron microscope (HRTEM, Talos F200X). The closed pores of all samples were characterized by Small-angle X-ray scattering (SAXS, Xenocs Xeuss 2.0, sample test distance is 2480 mm). Thermo gravimetry-Differential scanning calorimetry (TG-DSC, Netzsch STA 449 F3) was used to study the pyrolysis process of precursor. Gases generated during pyrolysis were characterized by Thermal gravimetric analysis combined with mass spectrometry (TG-MS, TA Instrument, SDT 650+ Discovery MS) to analyze the structural evolution of hard carbon material. X-ray photoelectron spectroscopy (XPS, Thermo Scientific K-Alpha) was recorded to represent the chemical state of the sample surface. After discharging or charging to the specified voltage, coin cells were disassembled in a glove box and the electrodes were washed with 1,2-dimethoxyethane (DME) and dried. Then, the electrodes were sealed in a container for ex-situ XRD and Raman measurement.

### *Electrochemical measurements*

The electrochemical performance was measured using CR2016 coin-type half cells assembled in an argon-filled glovebox (Mikrouna, H<sub>2</sub>O, O<sub>2</sub> < 0.1 ppm). The slurry of electrodes was prepared by uniformly mixing 90 wt.% almond shell-derived hard carbon powder, 5 wt.% sodium alginate (SA), 5 wt.% carbon black in an appropriate amount of deionized water. Before

assembling the cells, the pasted electrode obtained by coating the mixed slurry on copper foil was dried at 80 °C for 12 h under vacuum. The mass loading of active material is around 1 mg cm<sup>-2</sup>. Glass fiber (Whatman GF/A) and sodium foil were used as separators and the counter electrode. The electrolyte was a solution of 1 M NaPF<sub>6</sub> in DME. The galvanostatic charged/discharged and galvanostatic intermittent titration technique (GITT) tests were operated on LAND-CT2001A battery systems (LAND Electronic Co., Wuhan, China) with a voltage range of 0.01-2.0 V (vs. Na<sup>+</sup>/Na). In the full cells, the hard carbon anode was matched with the NVP cathode. The NVP electrode was prepared by mixing 80 wt.% NVP, 10 wt.% PVDF, 10 wt.% carbon black in an appropriate amount of NMP solution. The pasted electrode obtained by coating the mixed slurry on aluminum foil was dried at 80 °C for 24 h under vacuum. To ensure the overall performance of the full cell, the mass ratio of NVP and hard carbon was kept at 2.5:1. The charge/discharge cut-off voltage was set to 2-4 V, and the specific capacity was calculated based on the mass of NVP only. For the GITT test, the pulse current was set at 20 mA g<sup>-1</sup> for 10 min and an interval of 2 h. An electrochemical workstation (PARSTAT MC, AMETEK) was used to record cyclic voltammetry (CV) at different scan rates of 0.2-3 mV s<sup>-1</sup> between 0.01-2 V (vs. Na<sup>+</sup>/Na) and electrochemical impedance spectroscopy (EIS) between 0.01-10<sup>5</sup> Hz.

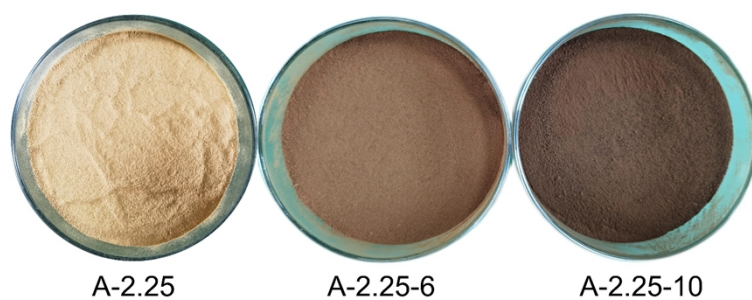

A-2.25

A-2.25-6

A-2.25-10

Fig. S1. Optical photographs of acid-treated precursors

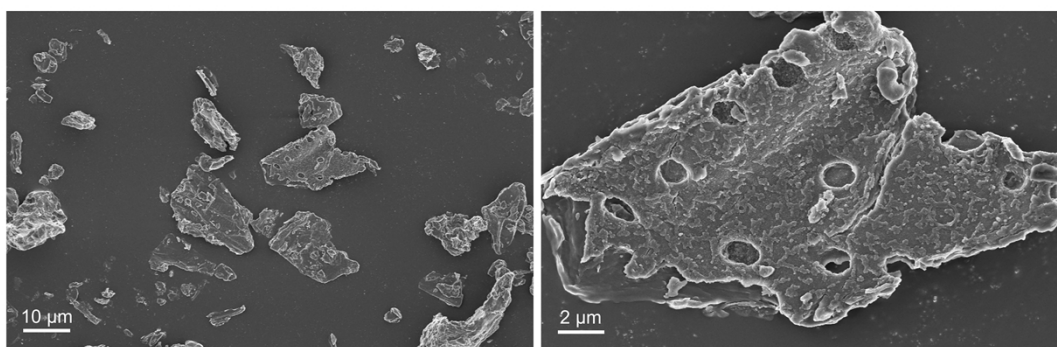

Fig. S2. SEM images of precursor without acid treatment

**Table S1** Component analysis(wt.%) of almond shell

| Samples      | cellulose | hemicellulose | lignin | water | ashes | volatile |
|--------------|-----------|---------------|--------|-------|-------|----------|
| almond shell | 27.3      | 20.8          | 31.9   | 2.91  | 1.78  | 71.62    |
| A-2.25       | 29.6      | 20.1          | 33.4   | 3.42  | 0.4   | 78.1     |
| A-2.25-6     | 33.9      | 15.1          | 37.9   | 4.63  | 0.33  | 73.3     |
| A-2.25-10    | 45.4      | /             | 45.3   | 7.3   | 0.22  | 73.0     |

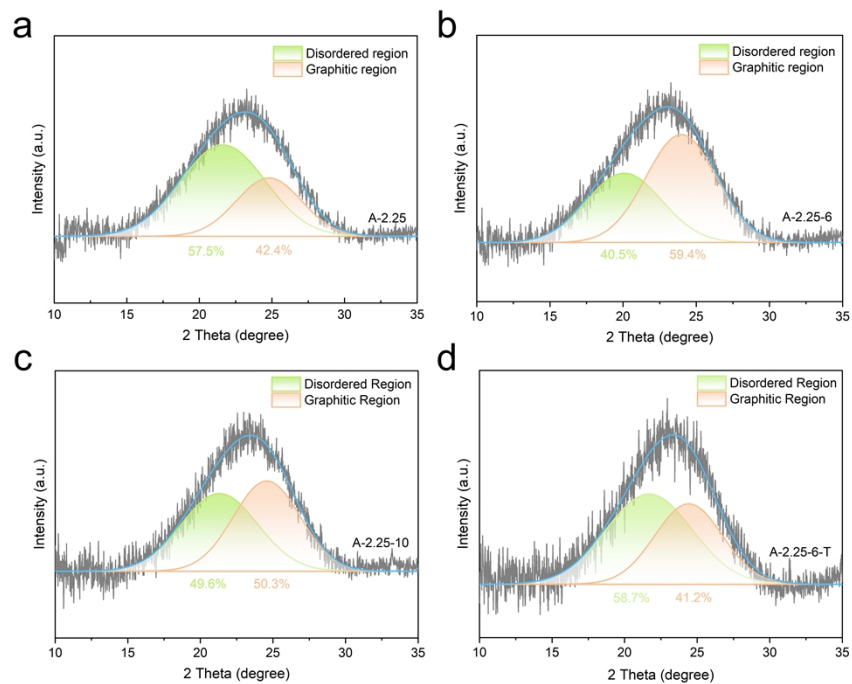

Fig. S3. 002 fitting peak of (a) A-2.25, (b) A-2.25-6, (c) A-2.25-10, (d) A-2.25-6-T

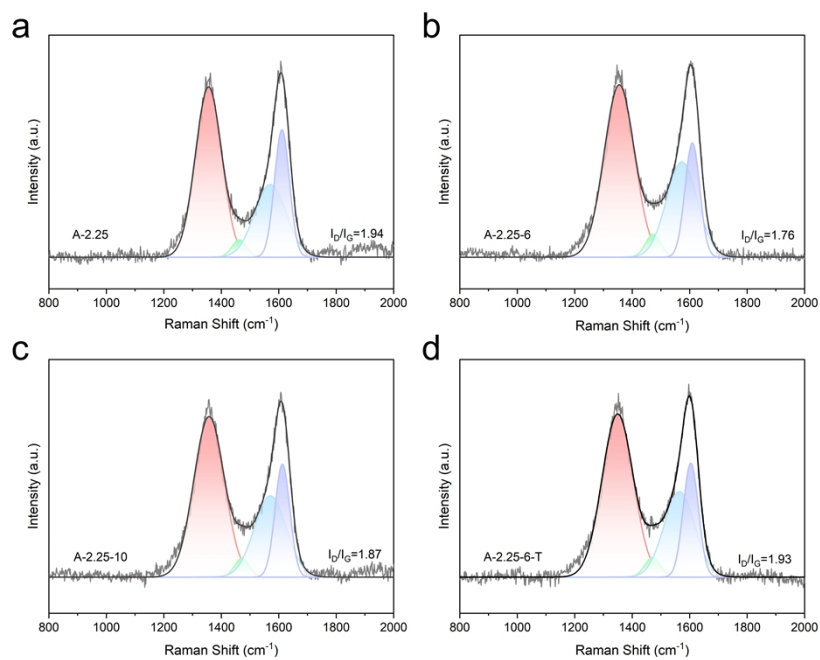

Fig. S4. Deconvoluted Raman spectra of (a) A-2.25, (b) A-2.25-6, (c) A-2.25-10, (d) A-2.25-6-T

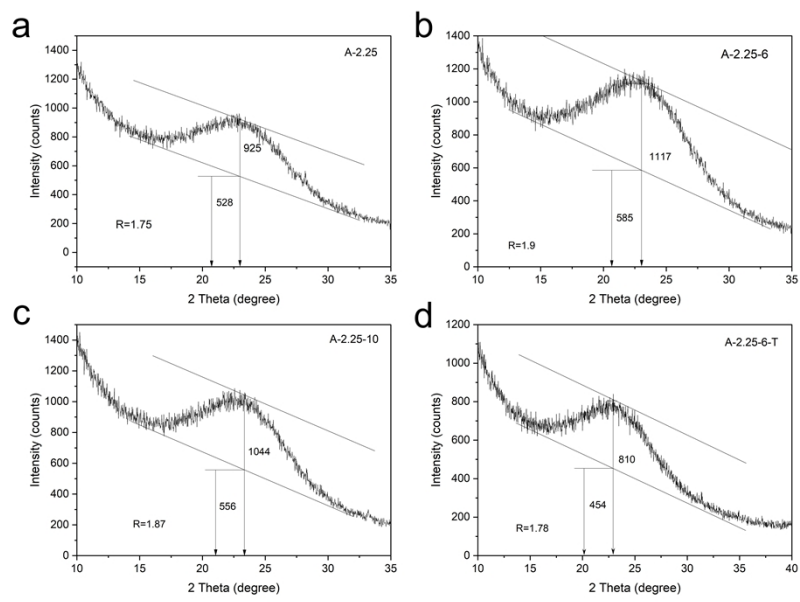

Fig. S5. Schematic diagram of the calculation of R-value from peak 002 for (a) A-2.25, (b) A-2.25-6, (c) A-2.25-10, (d) A-2.25-6-T

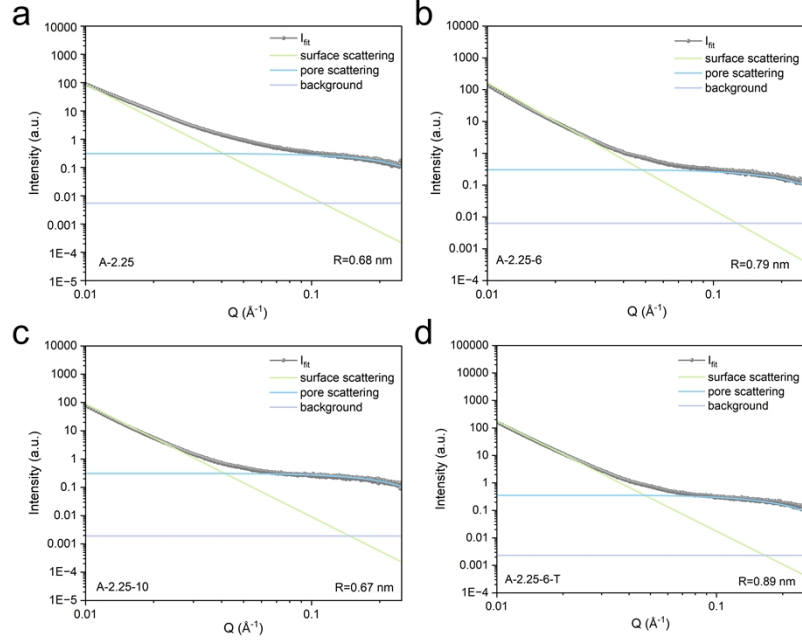

Fig. S6. Fitted SAXS patterns of (a) A-2.25, (b) A-2.25-6, (c) A-2.25-10, (d) A-2.25-6-T

The SAXS patterns are fitted based on the following model[1]:

$$I(q) = \frac{A}{q^4} + \frac{B' a_I^4}{(1 + a_I^2 q^2)^2} + D$$

$I(q)$ : scattered intensity as a function of  $q$ .

$q$ : scattering vector.

$A$ : proportional to the total surface areas of the large pores.

$B'$ : proportional to the total surface areas of the small pores.

$a_I$ : the characteristic length over which electron density variations occur.

$D$ : constant background term.

The radius of the pores can be obtained from the formula:  $R = a_I \sqrt{10}$ .



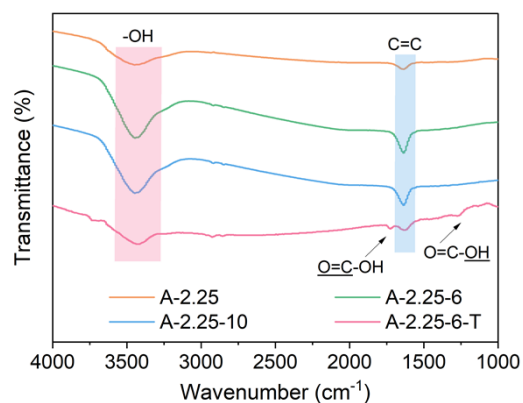

Fig. S7 FT-IR spectra of A-2.25, A-2.25-6, A-2.25-10, A-2.25-6-T

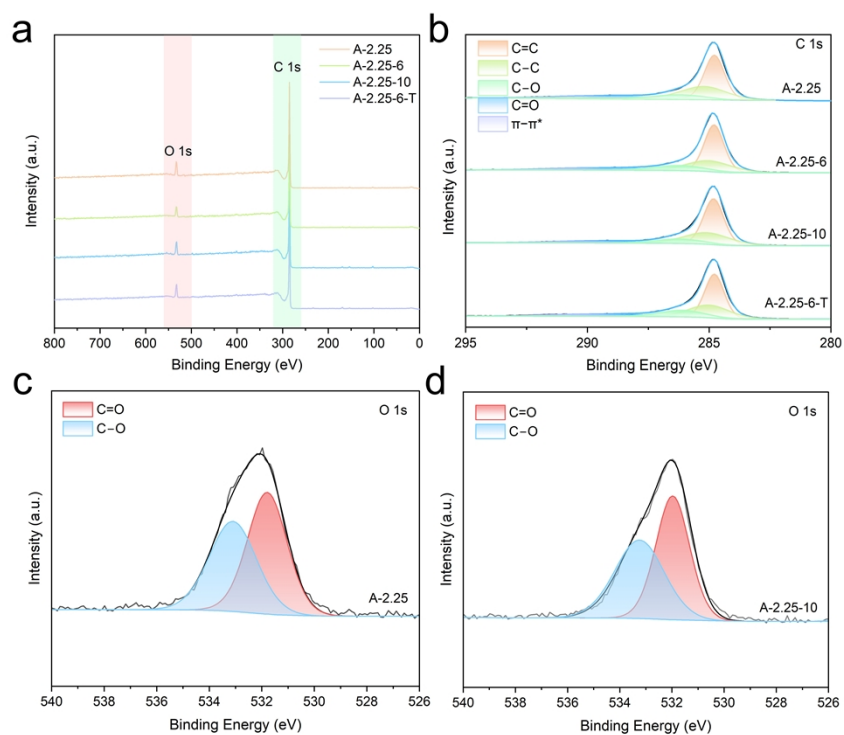

Fig. S8. XPS spectra (a) and C 1s high-resolution spectra (b) of A-2.25, A-2.25-6, A-2.25-10, A-2.25-6-T, O 1s high-resolution spectra of (c) A-2.25 and (d) A-2.25-10

**Table S2** The element contents of C and O in A-2.25, A-2.25-6, A-2.25-10, and A-2.25-6-T samples

| Samples    | Atomic % |      |
|------------|----------|------|
|            | C        | O    |
| A-2.25     | 92.97    | 7.03 |
| A-2.25-6   | 93.29    | 6.71 |
| A-2.25-10  | 93.07    | 6.93 |
| A-2.25-6-T | 92.98    | 7.02 |

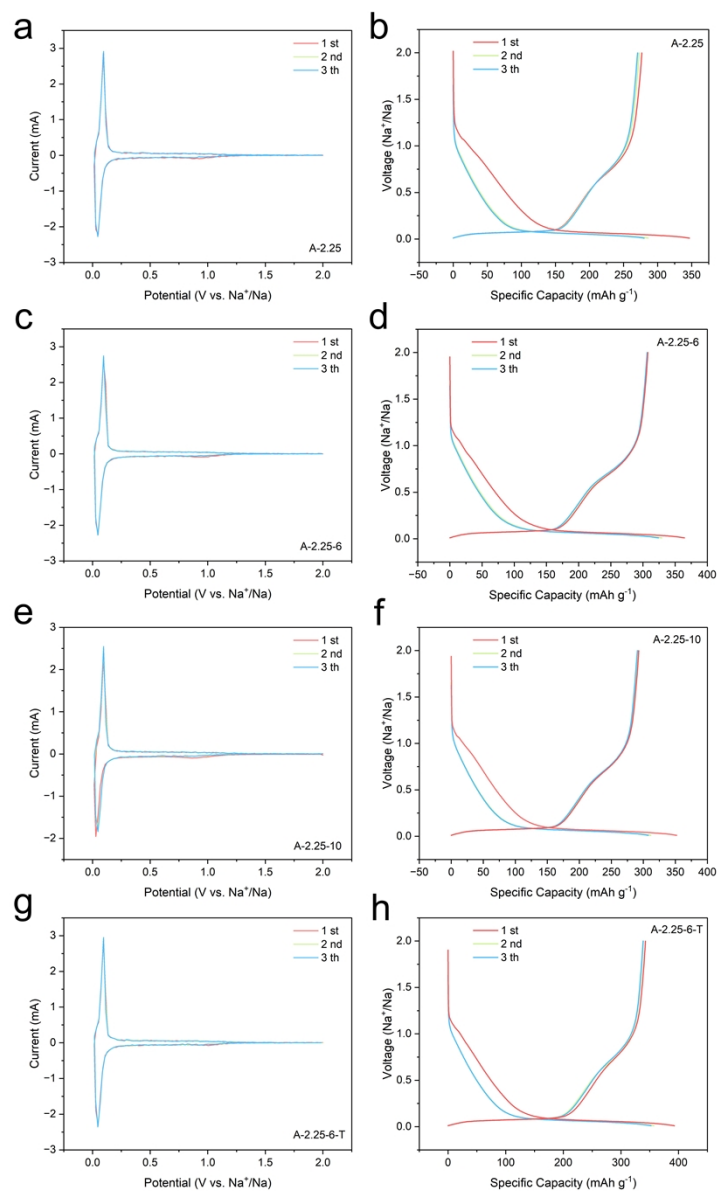

Fig. S9. CV curves at a scan rate of  $0.2 \text{ mV s}^{-1}$  (a, c, e, g) and galvanostatic discharge/charge profiles at  $0.03 \text{ A g}^{-1}$  (b, d, f, h) of A-2.25, A-2.25-6, A-2.25-10, A-2.25-6-T

**Table S3** Electrochemical performance of almond shell derived-hard carbon

| Samples    | Charge capacity<br>(mAh g <sup>-1</sup> ) | ICE<br>(%) | Retention ratio after<br>500 cycles(%) |
|------------|-------------------------------------------|------------|----------------------------------------|
| A-2.25     | 276.8                                     | 79.83      | 81.41                                  |
| A-2.25-6   | 319.5                                     | 82.57      | 87.43                                  |
| A-2.25-10  | 292.8                                     | 83.18      | 87.24                                  |
| A-2.25-6-T | 342.4                                     | 87.19      | 87.03                                  |

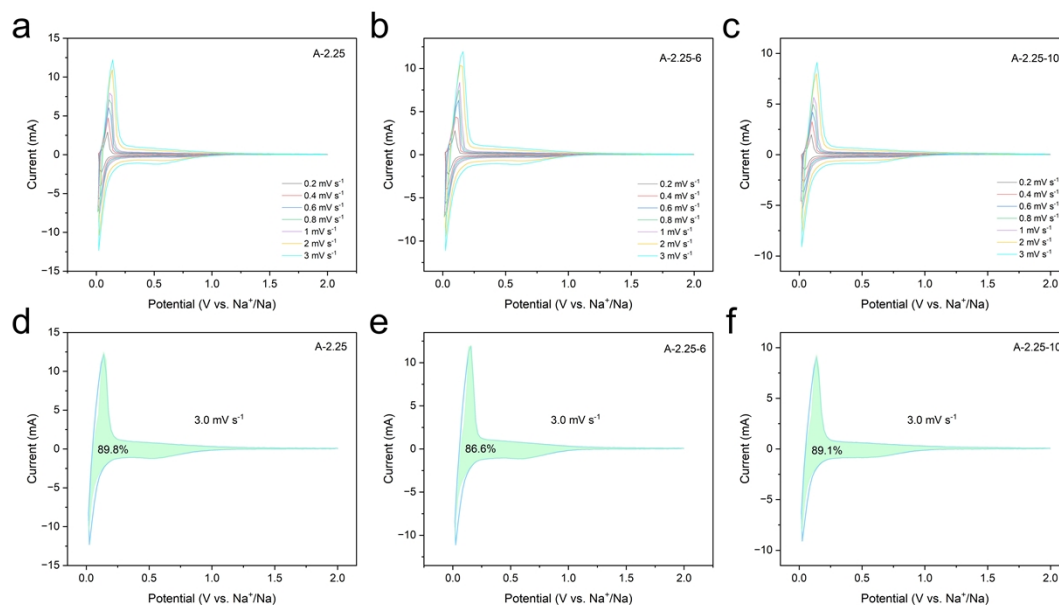

Fig. S10. (a-c) CV curves at various scan rates from 0.2 to 3.0 mV s<sup>-1</sup> and (d-f) CV curves with a calculated capacitive contribution at 3 mV s<sup>-1</sup> of A-2.25, A-2.25-6, and A-2.25-10

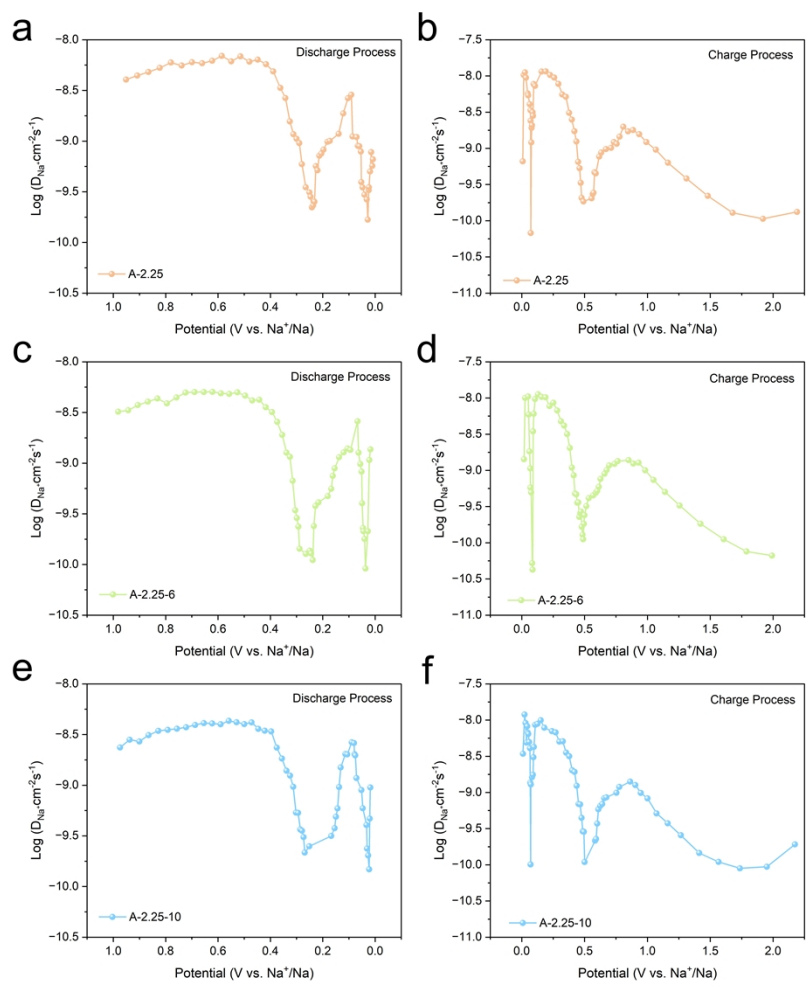

Fig. S11.  $\text{Na}^+$  diffusion coefficients calculated from the GITT potential profiles of (a-b) A-2.25, (c-d) A-2.25-6, and (e-f) A-2.25-10

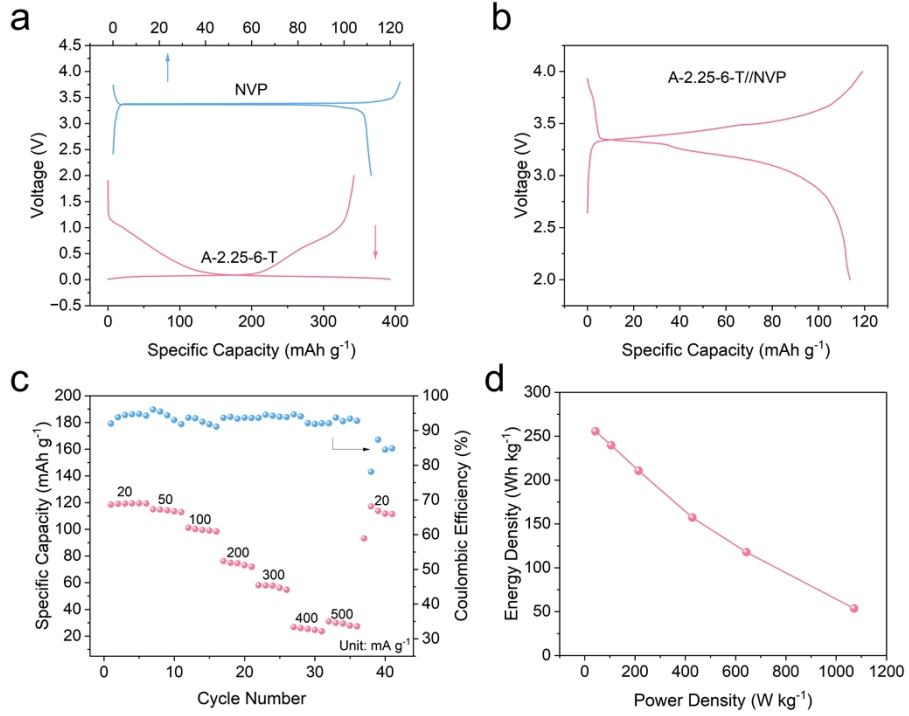

Fig. S12. (a) Galvanostatic discharge/charge profiles of NVP and A-2.25-6-T in half cells, electrochemical performance characterization of the NVP//A-2.25-6-T full cell: (b) initial galvanostatic discharge/charge profiles at 20 mA g<sup>-1</sup>, (c) rate performance, (d) energy density and power density at various current densities.

The power density and energy density of the full cells were calculated by following equations[2]:

$$P = (\Delta V \times I) / m$$

$$\Delta V = (V_{max} + V_{min}) / 2$$

$$E = (P \times t) / 3600$$

where  $I$  is the discharge current,  $t$  is the discharge time,  $m$  is the total loading mass of active materials,  $V_{max}$  and  $V_{min}$  are the voltage at the beginning and end of discharge, respectively.

**Table S4** Comparison of electrochemical performance of hard carbon anode in this work with reported related materials for sodium-ion batteries

| Samples                                | Raw materials                                               | Reversible capacity (mAh g <sup>-1</sup> ) | ICE (%) | Rate capacity (mAh g <sup>-1</sup> ) | Ref.      |
|----------------------------------------|-------------------------------------------------------------|--------------------------------------------|---------|--------------------------------------|-----------|
| Hard carbon                            | almond shell                                                | 342.4, 0.01-2 V, 30 mA g <sup>-1</sup>     | 87.19   | 189.6 at 5A g <sup>-1</sup>          | This work |
| Bamboo-derived hard carbon             | bamboo powder                                               | 348.5, 0-2.5 V, 30 mA g <sup>-1</sup>      | 84.1    | 206.5 at 2 A g <sup>-1</sup>         | [3]       |
| Agar-derived porous carbon             | agar and phytic acid                                        | 439, 0.01-3 V, 50 mA g <sup>-1</sup>       | 30.98   | 140 at 5A g <sup>-1</sup>            | [4]       |
| Chitosan-derived hard carbon           | chitosan                                                    | 317.4, 0.01-3 V, 500 mA g <sup>-1</sup>    | 70.59   | 238.9 at 5A g <sup>-1</sup>          | [5]       |
| Bio-spore-derived hard carbon          | spores of Calvatia Gigantea                                 | 438.5, 0-3 V, 25 mA g <sup>-1</sup>        | 90.23   | 254.8 at 5A g <sup>-1</sup>          | [6]       |
| Balloon-like porous hard carbon        | puffball                                                    | 205.05, 0.01-3 V, 100 mA g <sup>-1</sup>   | 57.6    | 102.12 at 10 A g <sup>-1</sup>       | [7]       |
| N, O, S tri-doping turbostratic carbon | 4, 6-diamino-2(1h)-pyrimidinethione                         | 321.5, 0.01-3 V, 100 mA g <sup>-1</sup>    | 55.53   | 175.5 at 5A g <sup>-1</sup>          | [8]       |
| N-doped carbon nanosheets              | carboxymethyl cellulose and g-C <sub>3</sub> N <sub>4</sub> | 304.7, 0-2.5 V, 50 mA g <sup>-1</sup>      | 79.52   | 197.6 at 5A g <sup>-1</sup>          | [9]       |
| Porous carbon sphere@void@carbon       | anhydrous glucose                                           | 216.7, 0.01-3 V, 100 mA g <sup>-1</sup>    | 85.3    | 140.3 at 10 A g <sup>-1</sup>        | [10]      |

## Reference

- [1] D.-A. Stevens, J.-R. Dahn, An In Situ Small-Angle X-Ray Scattering Study of Sodium Insertion into a Nanoporous Carbon Anode Material within an Operating Electrochemical Cell, *J. Electrochem. Soc.* 147 (2000) 4428, <https://doi.org/10.1149/1.1394081c>.
- [2] D. Sun, L. Zhao, P.-L. Sun, K. Zhao, Y.-K. Sun, Q. Zhang, Z.-C. Li, Z. M, F.-Z. Zheng, Y. Yang, C.-B. Lu, C. Peng, C.-M. Xu, Z.-H. Xiao, X.-L. Ma, Rationally Regulating Closed Pore Structures by Pitch Coating to Boost Sodium Storage Performance of Hard Carbon in Low-voltage Platforms, *Adv. Funct. Mater.* (2024) <https://doi.org/10.1002/adfm.202403642>.
- [3] T.-Y. Xu, X. Qiu, X. Zhang, Y.-Y. Xia, Regulation of surface oxygen functional groups and pore structure of bamboo-derived hard carbon for enhanced sodium storage performance, *Chem. Eng. J.* 452 (2023) 139514, <https://doi.org/10.1016/j.cej.2022.139514>.
- [4] T. Wang, L.-L. Liu, Y.-W. Wei, Y.-H. Gao, S. Wang, D.-Q. Jia, W. Zhang, J.-Q. Sha, Agar-Derived Slope-Dominated Carbon Anode with Puparium Like Nano-Morphology for Cost-Effective SIBs, *Small* (2023) 2309809, <https://doi.org/10.1002/sml.202309809>.
- [5] H.-L. Sun, Q.-Y. Zhang, F. Yuan, D. Zhang, Z.-J. Li, Q.-J. Wang, H. Wang, B. Wang, Unraveling the effect of carbon morphology evolution in hard carbons on sodium storage performance, *Inorg. Chem. Front.* 10 (22) (2023) 6547-6556, <https://doi.org/10.1039/D3QI01497E>.
- [6] T.-J. Tang, W.-L. Zhu, P.-P. Lan, X.-X. Lan, H.-R. Xie, P.-K. Shen, Z.-Q. Tian, Macro-micro structure engineering of bio-spore-derived hard carbon as an efficient anode in sodium ion batteries, *Chem. Eng. J.* 475 (2023) 146212, <https://doi.org/10.1016/j.cej.2023.146212>.
- [7] L.-H. Yu, L.-L. Zhang, X.-D. He, X. Tao, G.-Z. Zhao, H.-L. Xie, R.-L. Zhu, G. Zhu, Study of stable sodium ion storage in porous carbon derived from puffball biomass, *Ind. Crop. Prod.* 208 (2024) 117805, <https://doi.org/10.1016/j.indcrop.2023.117805>.
- [8] D.-C. Qin, L. Wang, X.-X. Zeng, J. Shen, F. Huang, G.-Y. Xu, M.-F. Zhu, Z.-H. Dai, Tailored edge-heteroatom tri-doping strategy of turbostratic carbon anodes for high-rate performance lithium and sodium-ion batteries, *Energy Storage Mater.* 54 (2023) 498-507, <https://doi.org/10.1016/j.ensm.2022.10.049>.
- [9] Y.-H. Zhao, Z. Hu, C.-L. Fan, P. Gao, R.-S. Zhang, Z.-X. Liu, J.-S. Liu, J.-L. Liu, Novel Structural Design and Adsorption/Insertion Coordinating Quasi-Metallic Na Storage Mechanism toward High-performance Hard Carbon Anode Derived from Carboxymethyl Cellulose, *Small* 19 (41) (2023), <https://doi.org/10.1002/sml.202303296>.
- [10] D.-J. Cheng, Z.-H. Li, M.-L. Zhang, Z.-H. Duan, J. Wang, C.-Y. Wang, Engineering Ultrathin Carbon Layer on Porous Hard Carbon Boosts Sodium Storage with High Initial Coulombic Efficiency, *ACS Nano* 17 (19) (2023) 19063-19075, <https://doi.org/10.1021/acsnano.3c04984>.
